# Supplementary material for: Applicability of the WHO maternal near-miss tool: A nationwide surveillance study in Suriname
Source: PubMed Central journal article supplement (PMC7649043; doi:10.7189/jogh.10.020429), 2020-12
Supplement: jogh-10-020429-s001.pdf [file jogh-10-020429-s001.pdf]

**Table S1** MNM events by the WHO, Namibian and SSA clinical, laboratory and management criteria

|                                                                       | WHO<br>n=71     | Namibian<br>n=118 | SSA<br>n=242     |
|-----------------------------------------------------------------------|-----------------|-------------------|------------------|
| <b>Clinical criteria</b>                                              | <b>44</b>       | <b>82</b>         | <b>174</b>       |
| Acute cyanosis                                                        | 0               | 0                 | 0                |
| Gasping                                                               | 2               | 2                 | 2                |
| Respiratory rate >40 or <6/min                                        | 11              | 11                | 11               |
| Shock                                                                 | 24              | 24                | 24               |
| Oliguria non responsive to fluids or diuretics                        | 6               | 6                 | 6                |
| Failure to form clots                                                 | 4               | 4                 | 4                |
| Loss of consciousness lasting more than 12 h                          | 10              | 10                | 10               |
| Cardiac Arrest                                                        | 2               | 2                 | 2                |
| Stroke                                                                | 2               | 2                 | 2                |
| Uncontrollable fits / total paralysis                                 | 6               | 6                 | 6                |
| Jaundice in the presence of pre-eclampsia                             | 0               | 0                 | 0                |
| Eclampsia <sup>a</sup>                                                | *               | 44                | 44               |
| Ruptured uterus <sup>a</sup>                                          | *               | 1                 | 1                |
| Sepsis or severe systemic infection <sup>b</sup>                      | *               | *                 | 40               |
| Pulmonary edema <sup>b</sup>                                          | *               | *                 | 13               |
| Severe complications of abortion <sup>b</sup>                         | *               | *                 | 21               |
| Severe malaria <sup>b</sup>                                           | *               | *                 | 0                |
| Severe pre-eclampsia with ICU admission <sup>b</sup>                  | *               | *                 | 103              |
| <b>Laboratory criteria</b>                                            | <b>31</b>       | <b>31</b>         | <b>28</b>        |
| Oxygen saturation <90% for >60 minutes                                | 8               | 8                 | 8                |
| PaO <sub>2</sub> /FiO <sub>2</sub> <200 mmHg <sup>c</sup>             | 0               | 0                 | *                |
| Creatinine ≥300µmol/l or ≥3.5 mg/dl                                   | 4               | 4                 | 4                |
| Bilirubin >100 µmol/l or > 6.0 mg/dl <sup>c</sup>                     | 2               | 2                 | *                |
| pH <7.1 <sup>c</sup>                                                  | 2               | 2                 | *                |
| Lactate >5 mEq/mL <sup>c</sup>                                        | 1               | 1                 | *                |
| Acute thrombocytopenia (<50.000 platelets/ml)                         | 17              | 17                | 17               |
| Loss of consciousness and glucose/ketoacids in urine                  | 1               | 1                 | 1                |
| <b>Management-based criteria</b>                                      | <b>34</b>       | <b>48</b>         | <b>122</b>       |
| Use of continuous vasoactive drugs <sup>c</sup>                       | 7               | 7                 | *                |
| Hysterectomy following infection or hemorrhage                        | 4               | 4                 | 4                |
| Transfusion of .. units of blood or red cells                         | 15 <sup>d</sup> | 31 <sup>e</sup>   | 112 <sup>f</sup> |
| Intubation and ventilation not related to anesthesia                  | 15              | 15                | 15               |
| Dialysis for acute renal failure                                      | 1               | 1                 | *                |
| Cardiopulmonary resuscitation                                         | 2               | 2                 | 2                |
| Laparotomy other than for caesarian section <sup>b</sup>              | *               | *                 | 6                |
| Laparotomy other than for caesarean or ectopic pregnancy <sup>g</sup> | *               | 2                 | *                |

**Legend**

<sup>a</sup> Criterion added by Namibian and SSA-tools; <sup>b</sup> Criterion added by SSA-tool; <sup>c</sup> Criterion excluded by SSA-tool; <sup>d</sup> Five blood products; <sup>e</sup> Four blood products; <sup>f</sup> Two blood products; <sup>g</sup> Criterion added by Namibian-tool; \* Not a criterion according to the specified tool

**Table S2** MNM events by the WHO, Namibian and SSA organ-dysfunction criteria

|                                                                | WHO<br>n=71     | Namibian<br>n=118 | SSA<br>n=242     |
|----------------------------------------------------------------|-----------------|-------------------|------------------|
| <b>Cardiovascular dysfunction</b>                              | <b>29</b>       | <b>29</b>         | <b>26</b>        |
| Shock                                                          | 24              | 24                | 24               |
| Cardiac Arrest                                                 | 2               | 2                 | 2                |
| Use of continuous vasoactive drugs <sup>a</sup>                | 7               | 7                 | *                |
| Cardiopulmonary resuscitation                                  | 2               | 2                 | 2                |
| Lactate >5mmol/l <sup>a</sup>                                  | 1               | 1                 | *                |
| pH <7.1 <sup>a</sup>                                           | 2               | 2                 | *                |
| <b>Respiratory dysfunction</b>                                 | <b>22</b>       | <b>22</b>         | <b>22</b>        |
| Acute cyanosis                                                 | 0               | 0                 | 0                |
| Gasping                                                        | 2               | 2                 | 2                |
| Respiratory rate >40 or <6/min                                 | 11              | 11                | 11               |
| Intubation/ventilation not related to anesthesia               | 15              | 15                | 15               |
| Oxygen saturation <90% for >60 minutes                         | 8               | 8                 | 8                |
| PaO <sub>2</sub> /FiO <sub>2</sub> <200 mmHg <sup>a</sup>      | 0               | 0                 | *                |
| <b>Renal dysfunction</b>                                       | <b>9</b>        | <b>9</b>          | <b>9</b>         |
| Oliguria non responsive to fluids or diuretics                 | 6               | 6                 | 6                |
| Dialysis for acute renal failure <sup>a</sup>                  | 1               | 1                 | *                |
| Creatinine ≥300μmol/l or ≥3.5 mg/dl                            | 4               | 4                 | 4                |
| <b>Coagulation/hematological dysfunction</b>                   | <b>29</b>       | <b>42</b>         | <b>119</b>       |
| Failure to form clots                                          | 4               | 4                 | 4                |
| Transfusion of .. units of blood or red cells                  | 15 <sup>b</sup> | 31 <sup>c</sup>   | 112 <sup>d</sup> |
| Severe acute thrombocytopenia (<50.000/ml)                     | 17              | 17                | 17               |
| <b>Hepatic dysfunction</b>                                     | <b>2</b>        | <b>2</b>          | <b>0</b>         |
| Jaundice in the presence of pre-eclampsia                      | 0               | 0                 | 0                |
| Bilirubin >100 μmol/l or > 6.0 mg/dl <sup>a</sup>              | 2               | 2                 | *                |
| <b>Neurological dysfunction</b>                                | <b>13</b>       | <b>13</b>         | <b>13</b>        |
| Loss of consciousness lasting more than 12 h                   | 10              | 10                | 10               |
| Loss of consciousness, glucose/ketoacids in urine              | 1               | 1                 | 1                |
| Stroke                                                         | 2               | 2                 | 2                |
| Uncontrollable fits / total paralysis                          | 6               | 6                 | 6                |
| <b>Uterine dysfunction</b>                                     | <b>4</b>        | <b>4</b>          | <b>4</b>         |
| Hysterectomy following infection or hemorrhage                 | 4               | 4                 | 4                |
| <b>Additional parameters</b>                                   | <b>*</b>        | <b>47</b>         | <b>176</b>       |
| Eclampsia <sup>e</sup>                                         | *               | 44                | 44               |
| Ruptured uterus <sup>e</sup>                                   | *               | 1                 | 1                |
| Sepsis or severe systemic infection <sup>f</sup>               | *               | *                 | 40               |
| Pulmonary edema <sup>f</sup>                                   | *               | *                 | 13               |
| Severe complications of abortion <sup>f</sup>                  | *               | *                 | 21               |
| Severe malaria <sup>f</sup>                                    | *               | *                 | 0                |
| Severe pre-eclampsia with ICU admission <sup>f</sup>           | *               | *                 | 103              |
| Laparotomy other than for CS <sup>f</sup>                      | *               | *                 | 6                |
| Laparotomy other than for CS or ectopic pregnancy <sup>g</sup> | *               | 2                 | *                |

**Legend**

<sup>a</sup> Criterion excluded by SSA-tool; <sup>b</sup> Five blood products; <sup>c</sup> Four blood products; <sup>d</sup> Two blood products; <sup>e</sup> Criterion added by Namibian and SSA-tools; <sup>f</sup> Criterion added by SSA-tool; <sup>g</sup> Criterion added by Namibian-tool; \* Not a criterion according to the specified tool

**Figure S1** Underlying causes of MNM for the different tools, number of events

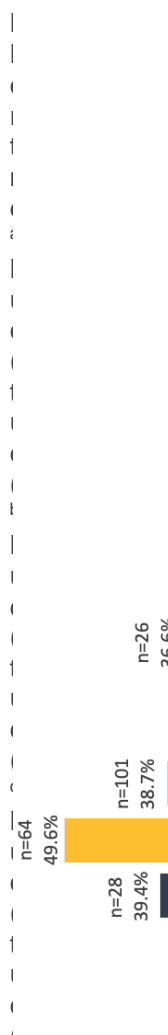

**Figure S2** Distribution of the underlying causes and differences between the MNM criteria, number of events

**Pregnancy with abortive outcome**

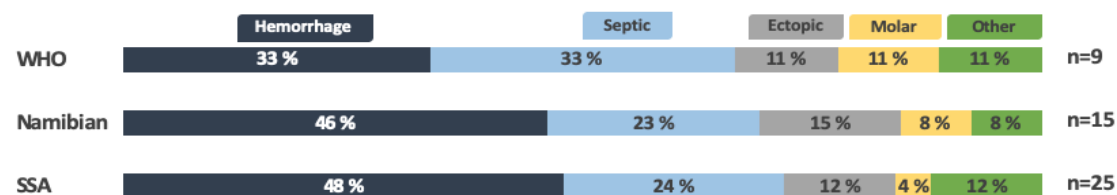

**Hypertensive disorders**

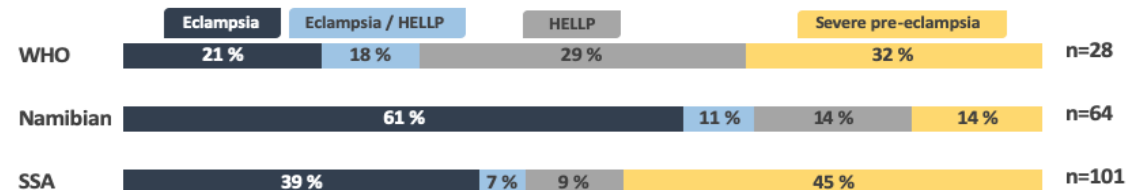

**Obstetric hemorrhage**

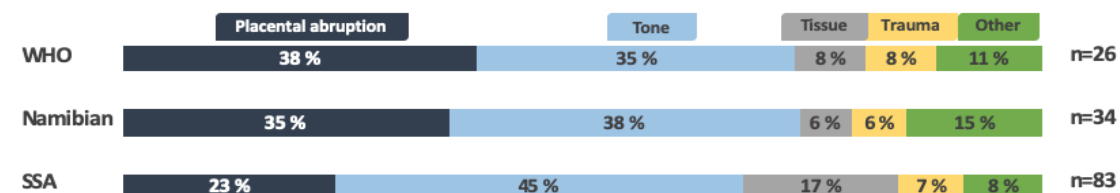

**Infection, pregnancy-related**

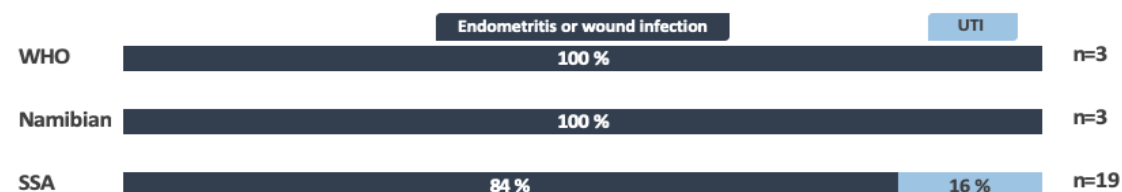

**Other obstetric complications**

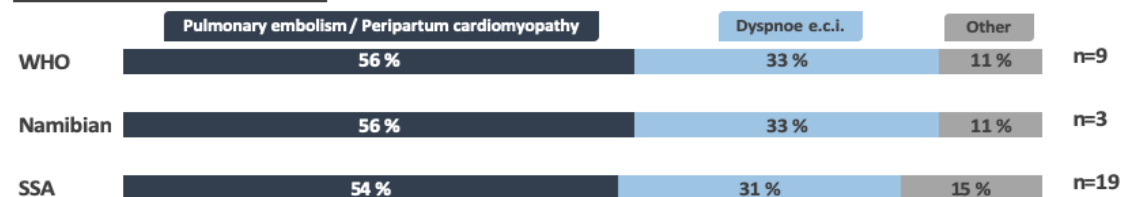

**Unanticipated complication of management**

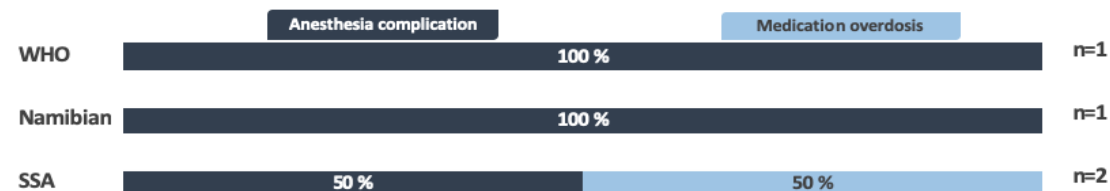

**Indirect, non-obstetric complications**

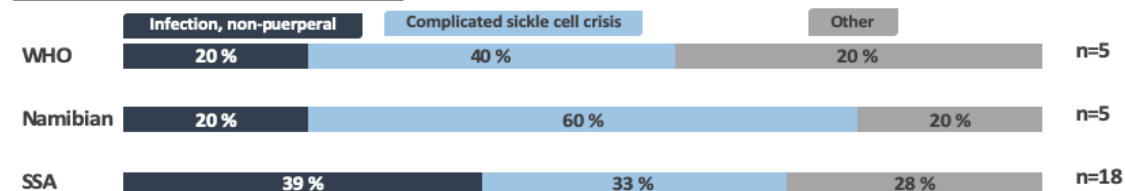

**Table S3** Association between Namibian maternal near-miss and maternal characteristics and perinatal outcomes (MNM n=98, no MNM n=9082)

| Maternal characteristics |                    |                        |      |        |      |              |      |        |      |              |
|--------------------------|--------------------|------------------------|------|--------|------|--------------|------|--------|------|--------------|
|                          | MNM <sup>1</sup>   | No MNM                 | cOR  | 95% CI |      | p-value      | aOR  | 95% CI |      | p-value      |
| Teenage pregnancy        | 13 / 98<br>(13.3%) | 1201 / 8989<br>(13.4%) | 0.99 | 0.55   | 1.78 | 0.978        |      |        |      |              |
| Old maternal age > 35yrs | 20 / 97<br>(20.6%) | 1275 / 8980<br>(14.2%) | 1.57 | 0.96   | 2.58 | 0.075        |      |        |      |              |
| Maroon ethnicity         | 43 / 97<br>(44.3%) | 2592 / 9041<br>(28.7%) | 1.98 | 1.32   | 2.97 | <b>0.001</b> | 1.93 | 1.25   | 2.99 | <b>0.003</b> |
| Nullipara                | 39 / 98<br>(39.8%) | 3110 / 9050<br>(34.4%) | 1.26 | 0.84   | 1.90 | 0.261        |      |        |      |              |

|                                                                                              |                        |                        |            |               |       |                  |                         |               |             |                  |
|----------------------------------------------------------------------------------------------|------------------------|------------------------|------------|---------------|-------|------------------|-------------------------|---------------|-------------|------------------|
| Grande multipara ( $\geq 4$ )                                                                | 22 / 98<br>(22.4%)     | 1197 / 9050<br>(13.2%) | 1.90       | 1.18          | 3.06  | <b>0.009</b>     | 1.47                    | 0.86          | 2.53        | 0.162            |
| Multiple pregnancy                                                                           | 1 / 98<br>(1.0%)       | 120 / 9082<br>(1.3%)   | 0.77       | 0.11          | 5.57  | 0.796            |                         |               |             |                  |
| <b>Perinatal outcomes</b>                                                                    |                        |                        |            |               |       |                  |                         |               |             |                  |
|                                                                                              | <b>MNM<sup>2</sup></b> | <b>No MNM</b>          | <b>cOR</b> | <b>95% CI</b> |       | <b>p-value</b>   | <b>aOR</b>              | <b>95% CI</b> |             | <b>p-value</b>   |
| Low birth weight (<2500 g)                                                                   | 48 / 94<br>(51.1%)     | 1278 / 9037<br>(14.1%) | 6.34       | 4.21          | 9.53  | <b>&lt;0.001</b> | 1.34 <sup>3</sup>       | 0.67          | 2.67        | 0.41             |
| Preterm birth (GA <37w)                                                                      | 53 / 98<br>(54.1%)     | 1248 / 9082<br>(13.7%) | 7.39       | 4.95          | 11.05 | <b>&lt;0.001</b> | <b>2.25<sup>4</sup></b> | <b>1.11</b>   | <b>4.56</b> | <b>0.025</b>     |
| Low Apgar 5 min below 7                                                                      | 9 / 78<br>(11.5%)      | 224 / 8815<br>(2.5%)   | 5.00       | 2.47          | 10.15 | <b>&lt;0.001</b> | 1.91 <sup>5</sup>       | 0.83          | 4.39        | 0.128            |
| Late stillbirth (GA>28w)                                                                     | 15 / 98<br>(15.3%)     | 107 / 9082<br>(1.2%)   | 15.2       | 8.5           | 27.1  | <b>&lt;0.001</b> | <b>4.74<sup>5</sup></b> | <b>2.34</b>   | <b>9.62</b> | <b>&lt;0.001</b> |
| <b>Legend</b>                                                                                |                        |                        |            |               |       |                  |                         |               |             |                  |
| <sup>1</sup> MNM is the dependent variable                                                   |                        |                        |            |               |       |                  |                         |               |             |                  |
| <sup>2</sup> MNM is the independent variable                                                 |                        |                        |            |               |       |                  |                         |               |             |                  |
| <sup>3</sup> Adjusted for age, parity ethnicity, gestational age, Apgar score and stillbirth |                        |                        |            |               |       |                  |                         |               |             |                  |
| <sup>4</sup> Adjusted for age, parity ethnicity, birth weight, Apgar score and stillbirth    |                        |                        |            |               |       |                  |                         |               |             |                  |
| <sup>5</sup> Adjusted for age, parity, ethnicity, gestational age and birth weight           |                        |                        |            |               |       |                  |                         |               |             |                  |
| GA: gestational age                                                                          |                        |                        |            |               |       |                  |                         |               |             |                  |

**Table S4** Association between Sub-Sahara African maternal near-miss and maternal characteristics and perinatal outcomes (MNM n=209, no MNM n=8971)

| Maternal characteristics                                                                                                                                                                                                                                                                                                                                                                                              |                      |                        |              |             |              |                  |                         |             |             |                  |
|-----------------------------------------------------------------------------------------------------------------------------------------------------------------------------------------------------------------------------------------------------------------------------------------------------------------------------------------------------------------------------------------------------------------------|----------------------|------------------------|--------------|-------------|--------------|------------------|-------------------------|-------------|-------------|------------------|
|                                                                                                                                                                                                                                                                                                                                                                                                                       | MNM <sup>1</sup>     | No MNM                 | cOR          | 95% CI      |              | p-value          | aOR                     | 95% CI      |             | p-value          |
| Teenage pregnancy                                                                                                                                                                                                                                                                                                                                                                                                     | 23 / 208<br>(11.1%)  | 1191 / 8879<br>(13.4%) | 0.80         | 0.52        | 1.24         | 0.324            |                         |             |             |                  |
| Old maternal age > 35yrs                                                                                                                                                                                                                                                                                                                                                                                              | 45 / 207<br>(21.7%)  | 1250 / 8870<br>(14.1%) | <b>1.69</b>  | <b>1.21</b> | <b>2.37</b>  | <b>0.002</b>     | <b>1.50</b>             | <b>1.03</b> | <b>2.20</b> | <b>0.036</b>     |
| Maroon ethnicity                                                                                                                                                                                                                                                                                                                                                                                                      | 76 / 208<br>(36.5%)  | 2559 / 8930<br>(28.7%) | <b>1.43</b>  | <b>1.08</b> | <b>1.91</b>  | <b>0.014</b>     | <b>1.42</b>             | <b>1.04</b> | <b>1.94</b> | <b>0.027</b>     |
| Nullipara                                                                                                                                                                                                                                                                                                                                                                                                             | 74 / 208<br>(35.6%)  | 2075 / 8940<br>(34.4%) | 1.05         | 0.79        | 1.40         | 0.723            |                         |             |             |                  |
| Grande multipara (≥ 4)                                                                                                                                                                                                                                                                                                                                                                                                | 43 / 208<br>(20.7%)  | 1176 / 8940<br>(13.2%) | <b>1.72</b>  | <b>1.22</b> | <b>2.42</b>  | <b>0.002</b>     | 1.36                    | 0.93        | 1.99        | 0.113            |
| Multiple pregnancy                                                                                                                                                                                                                                                                                                                                                                                                    | 9 / 209<br>(4.3%)    | 112 / 8971<br>(1.2%)   | <b>3.56</b>  | <b>1.78</b> | <b>7.12</b>  | <b>&lt;0.001</b> | <b>3.38</b>             | <b>1.68</b> | <b>6.81</b> | <b>0.001</b>     |
| Perinatal outcomes                                                                                                                                                                                                                                                                                                                                                                                                    |                      |                        |              |             |              |                  |                         |             |             |                  |
|                                                                                                                                                                                                                                                                                                                                                                                                                       | MNM <sup>2</sup>     | No MNM                 | cOR          | 95% CI      |              | p-value          | aOR                     | 95% CI      |             | p-value          |
| Low birth weight (<2500 g)                                                                                                                                                                                                                                                                                                                                                                                            | 92 / 202<br>(45.5%)  | 1234 / 8929<br>(13.8%) | <b>5.22</b>  | <b>3.93</b> | <b>6.92</b>  | <b>&lt;0.001</b> | 1.45 <sup>3</sup>       | 0.92        | 2.92        | 0.114            |
| Preterm birth (GA <37w)                                                                                                                                                                                                                                                                                                                                                                                               | 101 / 209<br>(48.3%) | 1200 / 8971<br>(13.4%) | <b>6.06</b>  | <b>4.59</b> | <b>8.00</b>  | <b>&lt;0.001</b> | <b>2.57<sup>4</sup></b> | <b>1.62</b> | <b>4.11</b> | <b>&lt;0.001</b> |
| Low Apgar 5 min below 7                                                                                                                                                                                                                                                                                                                                                                                               | 20 / 172<br>(11.6%)  | 213 / 8721<br>(2.4%)   | <b>5.26</b>  | <b>3.23</b> | <b>8.54</b>  | <b>&lt;0.001</b> | <b>2.41<sup>5</sup></b> | <b>1.36</b> | <b>4.30</b> | <b>0.003</b>     |
| Late stillbirth (GA>28w)                                                                                                                                                                                                                                                                                                                                                                                              | 23 / 209<br>(11.0%)  | 99 / 8971<br>(1.1%)    | <b>11.08</b> | <b>6.88</b> | <b>17.84</b> | <b>&lt;0.001</b> | <b>3.98<sup>5</sup></b> | <b>2.24</b> | <b>7.06</b> | <b>&lt;0.001</b> |
| <b>Legend</b><br><sup>1</sup> MNM is the dependent variable<br><sup>2</sup> MNM is the independent variable<br><sup>3</sup> Adjusted for age, parity ethnicity, gestational age, Apgar score and stillbirth<br><sup>4</sup> Adjusted for age, parity ethnicity, birth weight, Apgar score and stillbirth<br><sup>5</sup> Adjusted for age, parity, ethnicity, gestational age and birth weight<br>GA: gestational age |                      |                        |              |             |              |                  |                         |             |             |                  |
